# Supplementary material for: Methylation and Expression of FTO and PLAG1 Genes in Childhood Obesity: Insight into Anthropometric Parameters and Glucose–Lipid Metabolism
Source: MDPI journal article supplement (doi:10.3390/nu13051683), 2021-05-15
Supplement: s1 [file s1]

## Article

# Methylation and expression of FTO and PLAG1 genes in childhood obesity: insight into anthropometric parameters and glucose-lipid metabolism

Wojciech Czogała <sup>1</sup>, Małgorzata Czogała <sup>1,2</sup>, Wojciech Strojny <sup>1</sup>, Gracjan Wątor <sup>3</sup>, Paweł Wołkow <sup>3</sup>, Małgorzata Wójcik <sup>4</sup>, Mirosław Bik Multanowski <sup>5</sup>, Przemysław Tomasik <sup>6</sup>, Andrzej Wędrychowicz <sup>7</sup>, Wojciech Kowalczyk <sup>8</sup>, Karol Mikłusiak <sup>8</sup>, Agnieszka Łazarczyk <sup>8</sup>, Przemysław Hałubiec <sup>8</sup>, and Szymon Skoczeń <sup>1,2,\*</sup>

<sup>1</sup> Department of Pediatric Oncology and Hematology, University Children's Hospital of Krakow, Poland; [czogala@tlen.pl](mailto:czogala@tlen.pl) (W.C.), [Wojciech.strojny@mp.pl](mailto:Wojciech.strojny@mp.pl) (W.S.)

<sup>2</sup> Department of Pediatric Oncology and Hematology, Faculty of Medicine, Jagiellonian University Medical College, Krakow, Poland; [malgorzata.czogala@uj.edu.pl](mailto:malgorzata.czogala@uj.edu.pl) (M.C.), [szymon.skoczen@uj.edu.pl](mailto:szymon.skoczen@uj.edu.pl) (S.S.)

<sup>3</sup> Center for Medical Genomics – OMICRON, Jagiellonian University Medical College, Krakow, Poland; [gracjan.wator@uj.edu.pl](mailto:gracjan.wator@uj.edu.pl) (G.W.), [pawel.wolkow@uj.edu.pl](mailto:pawel.wolkow@uj.edu.pl) (P.W.)

<sup>4</sup> Department of Pediatric and Adolescent Endocrinology, Faculty of Medicine, Jagiellonian University Medical College, Krakow, Poland; [malgorzata.wojcik@uj.edu.pl](mailto:malgorzata.wojcik@uj.edu.pl)

<sup>5</sup> Department of Medical Genetics, Faculty of Medicine, Jagiellonian University Medical College, Krakow, Poland; [miroslaw.bik-multanowskitomasik@uj.edu.pl](mailto:miroslaw.bik-multanowskitomasik@uj.edu.pl)

<sup>6</sup> Department of Clinical Biochemistry, Faculty of Medicine, Jagiellonian University Medical College, Krakow, Poland; [p.tomasik@uj.edu.pl](mailto:p.tomasik@uj.edu.pl)

<sup>7</sup> Department of Pediatrics, Gastroenterology and Nutrition, Faculty of Medicine, Jagiellonian University Medical College, Krakow, Poland; [andrzej.wedrychowicz@uj.edu.pl](mailto:andrzej.wedrychowicz@uj.edu.pl)

<sup>8</sup> Student Scientific Group of Pediatric Oncology and Hematology, Jagiellonian University Medical College, Krakow, Poland; [w.kowalczyk@student.uj.edu.pl](mailto:w.kowalczyk@student.uj.edu.pl) (W.K.), [karolmiklusiak@gmail.com](mailto:karolmiklusiak@gmail.com) (K.M.), [agnieszka.lazarczyk@student.uj.edu.pl](mailto:agnieszka.lazarczyk@student.uj.edu.pl) (A.L.), [przemyslawhalubiec@gmail.com](mailto:przemyslawhalubiec@gmail.com) (P.H.)

\* Correspondence: [szymon.skoczen@uj.edu.pl](mailto:szymon.skoczen@uj.edu.pl); Tel.: +48503523785

## Supplementary

**Figure S1.** Plots presenting the distribution of data of the studied parameters depending of the level of FTO expression (shown as log2 of the absolute value of expression for clarity of the plot). A. Insulin – OGTT 60 min ( $\mu\text{IU/mL}$ ) B. Insulin – OGTT 120 min ( $\mu\text{IU/mL}$ ) C. BF\_kg D. BMI ( $\text{kg/m}^2$ ) E. HOMA-IR F. BMI percentile G. Waist circumference (cm) H. Waist circumference percentile.

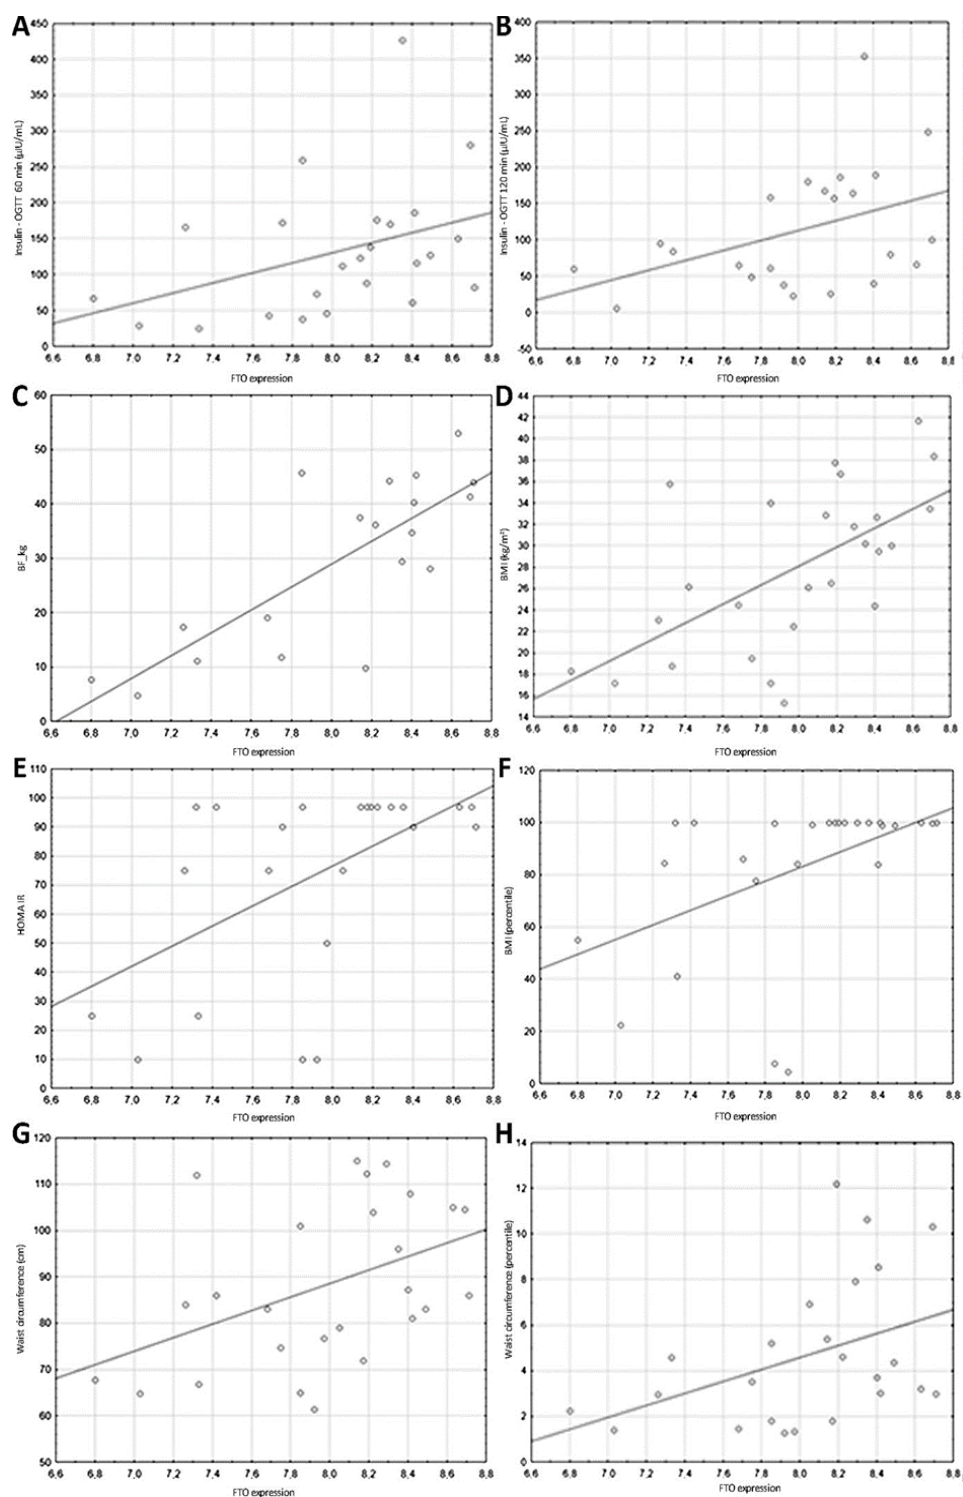

**Table S1.** Descriptive statistics of the children's age

**Table S2.** Correlation results of blood pressure with FTO gene methylation, expression and PLAG1 gene expression.

| Group            | Age mean | Age SD | Age Q25 | Age median | Age Q75 |
|------------------|----------|--------|---------|------------|---------|
| Obese children   | 13.8     | 3.0    | 12.8    | 14.7       | 15.7    |
| Healthy children | 14.3     | 1.9    | 12.8    | 14.2       | 15.8    |

| Blood pressure                             | FTO gene region 1 methylation        |         | FTO expression                       |         | PLAG1 expression                     |         |
|--------------------------------------------|--------------------------------------|---------|--------------------------------------|---------|--------------------------------------|---------|
|                                            | Spearman's correlation coefficient r | p value | Spearman's correlation coefficient r | p value | Spearman's correlation coefficient r | p value |
| Mean systolic blood pressure (mmHg)        | 0.212                                | 0.319   | 0.196                                | 0.359   | 0.141                                | 0.512   |
| Mean systolic blood pressure (percentile)  | 0.196                                | 0.36    | 0.311                                | 0.139   | 0.369                                | 0.076   |
| Mean diastolic blood pressure (mmHg)       | 0.132                                | 0.537   | -0.108                               | 0.615   | 0.001                                | 0.995   |
| Mean diastolic blood pressure (percentile) | 0.134                                | 0.532   | -0.332                               | 0.743   | 0.177                                | 0.409   |
| Mean heart rate                            | 0.033                                | 0.879   | 0.095                                | 0.657   | 0.209                                | 0.327   |

**Table S3.** Correlation results of biochemical parameters with FTO gene methylation, expression and PLAG1 gene expression.

| Biochemical parameters                   | FTO gene region 1 methylation        |         | FTO expression                       |         | PLAG1 expression                     |         |
|------------------------------------------|--------------------------------------|---------|--------------------------------------|---------|--------------------------------------|---------|
|                                          | Spearman's correlation coefficient r | p value | Spearman's correlation coefficient r | p value | Spearman's correlation coefficient r | p value |
| Total cholesterol (mmol/L)               | 0.057                                | 0.79    | 0.094                                | 0.664   | -0.027                               | 0.899   |
| LDL cholesterol (mmol/L)                 | 0.071                                | 0.741   | 0.028                                | 0.898   | -0.008                               | 0.969   |
| HDL cholesterol (mmol/L)                 | -0.351                               | 0.093   | -0.008                               | 0.969   | -0.144                               | 0.502   |
| Free fatty acids – OGTT 60 min (mmol/L)  | 0.33                                 | 0.168   | 0.189                                | 0.439   | 0.109                                | 0.654   |
| Free fatty acids - OGTT 120 min (mmol/L) | 0.357                                | 0.147   | 0.375                                | 0.125   | 0.426                                | 0.078   |
| Glucose- OGTT 60 min (mmol/L)            | -0.094                               | 0.662   | 0.145                                | 0.499   | -0.03                                | 0.889   |
| Glucose- OGTT 120 min (mmol/L)           | -0.217                               | 0.308   | 0.052                                | 0.809   | 0.142                                | 0.509   |

### 3.3. Formatting of Study design

This is example 1 of an equation:

OMICRON 10 V 2017r.

METHYLATION ANALYSIS

TARGET:

Pleiomorphic adenoma gene 1 (PLAG1)

Fat mass and obesity associated (FTO)

Methylation regions, based on MethyL-DIP (Nimblegene), tissue Whole Blood (source: Ensembl).

FTO (Chr16)

Region 1 (FTO – upstream)

53703684-53703899

```
53703663 ACGCCAGCAGAACTCCAGGGCCAACTCCAGGGCCTTCTCCAGGCGGCAGAGCGGA CCCTA 53703722
53703723 GGACCCCGGCCCGCGCTGCAGTGGGGAGGGTCAGCAACCTCCACCCACCTCATCCTCCC 53703782
53703783 CCATCCTCCCGGGTACTCACCCTGCCACTGGCCCT GCAGCTAGCTACCGTTGCTATAGCG 53703842
53703843 CCGACAGCGTGGCGGGCGGCTGGCCGAGAGGAGCACGGGAGAAACATGGCAGGCTCCCGT 53703902
```

Region 3 (FTO – methylated CpG site in various cancer cell lines – data from WGBS)

54054572 (CG)

```
54054423 TTCCTGGGCAGGAAGGAGAGAATAGAGCCAAGCTGATGGAATAAACTGCGTGATTGAG 54054482
54054483 CCGGTATAAGACTGGAAATCTTTGTTACTGCCATGATGGAATACCTTGTATTAGTGCC 54054542
54054543 TCTGTCTTCGCTGAGCTGAGAAACCTCCGGTGTGTTTTGGCCATCAAACTACTTGCC 54054602
54054603 ATTGTCACCGGTAGTCCAGATTGTAAGGCTAAAGTGCTGAGGACAATTAGTAATTGGTG 54054662
54054663 ACTGGCTGCTATGATGTATAGTTGCTTAGCAACGGTGCCTGAATTAAGTCTCTGGAAGTG 54054722
```

Region 1 (PLAG1 exon1)

56211059-56211208

```
56211264 ACAATGGCTGCTGGAAAGAGGCGTAAGGAAACAATTCAGGCCCGCCGCTCCAGCCCG 56211205
56211204 AAATA TGAGAAAAAATTATTAGAAATTCGCGGGCGGTGTAGAGGCGGCGGACGGGGCG 56211145
56211144 GAGGGAGGATGTTAAAGCCCGCGGTGAGTTCTCCGGGGGTCCGGGGCGGCGGCGAGGCG 56211085
56211084 TTAGCGGGAGAAATATCAGGGTTAT TTAAATTATGGGACTAGCCGAGGGGGCAGAGGAG 56211025
```
